# Supplementary material for: Unique profile on the progress free survival and overall survival in patients with advanced non-small cell lung cancer in the Qujing area, Southwest China
Source: Front Immunol. 2023 Feb 28;14:1012166. doi: 10.3389/fimmu.2023.1012166 (PMC10011462; doi:10.3389/fimmu.2023.1012166)
Supplement: Supplementary file 2 [file Table_1.xls]

## Sheet: Sheet1
Supplementary_eTable S1: clinical and molecular summary for TCGA-advanced NSCLC
sample_ID	Gender	Stage	TMB	TMB value	PD-L1 expression	TP53	EGFR	KRAS	SMAD4	Cancer type	OS	Follow up	Subclass_2
TCGA-05-4425-01A-01D-1753-08	Female	IV	0	0.8	0.093	0	0	0	0	LUAD	22	1	TCGA
TCGA-18-3417-01A-01D-1441-08	Male	IV	0	4.96	0.072	0	0	0	0	LUSC	25	1	TCGA
TCGA-34-2605-01A-01D-1522-08	Male	IIIB	0	6.46	NA	0	0	0	0	LUSC	30	1	TCGA
TCGA-37-4132-01A-01D-1352-08	Female	IV	0	5.48	0.09	1	0	0	0	LUSC	8	1	TCGA
TCGA-37-A5EN-01A-21D-A26M-08	Male	IIIB	0	4.12	0.084	1	0	0	0	LUSC	12	1	TCGA
TCGA-66-2789-01A-01D-0983-08	Male	IIIB	0	6.72	0.088	0	0	0	0	LUSC	29	1	TCGA
TCGA-37-4132-01A-01D-1352-08	Female	IV	0	5.48	0.089	1	0	0	0	LUSC	7.6	1	TCGA
TCGA-18-3417-01A-01D-1441-08	Male	IV	0	4.96	0.072	0	0	0	0	LUSC	25.3	1	TCGA
TCGA-66-2742-01A-01D-0983-08	Male	IV	0	4.24	0.082	1	1	0	0	LUSC	21.4	1	TCGA
TCGA-37-A5EN-01A-21D-A26M-08	Male	IIIB	0	4.12	0.084	1	0	0	0	LUSC	11.9	1	TCGA
TCGA-66-2783-01A-01D-1267-08	Male	IIIB	0	4.18	0.102	0	0	0	0	LUSC	25.3	1	TCGA
TCGA-66-2800-01A-01D-1267-08	Male	IIIB	0	3.46	0.094	1	0	0	0	LUSC	49.7	1	TCGA
TCGA-66-2794-01A-01D-1267-08	Male	IIIB	0	2.9	0.117	1	0	0	0	LUSC	54.8	1	TCGA
TCGA-99-8033-01A-11D-2238-08	Female	IV	0	3.26	0.106	1	0	1	0	LUAD	5.7	1
TCGA-53-7813-01A-11D-2167-08	Female	IIIB	0	2.86	0.071	0	0	1	0	LUAD	13.9	1
TCGA-78-7149-01A-11D-2036-08	Male	IIIB	0	2.72	0.057	1	0	0	0	LUAD	36.4	1	TCGA
TCGA-66-2778-01A-02D-1522-08	Female	IIIB	0	2.24	0.078	1	0	0	0	LUSC	19.3	1	TCGA
TCGA-93-A4JN-01A-11D-A24P-08	Male	IV	0	1.42	0.09	1	0	0	0	LUAD	12.7	1	TCGA
TCGA-97-8171-01A-11D-2284-08	Male	IV	0	1.12	0.064	0	1	0	0	LUAD	3.6	1	TCGA
TCGA-64-1680-01A-02D-0969-08	Male	IV	0	1.1	0.07	0	0	0	0	LUAD	37.5	1	TCGA
TCGA-78-7160-01A-11D-2036-08	Male	IV	0	0.98	0.088	0	0	1	0	LUAD	22.6	1
TCGA-93-A4JP-01A-11D-A24P-08	Male	IV	0	1.08	0.096	1	1	0	0	LUAD	8.97	1	TCGA
TCGA-05-4425-01A-01D-1753-08	Female	IV	0	0.8	0.093	0	0	0	0	LUAD	22.3	1	TCGA
